# Supplementary material for: AluMine: alignment-free method for the discovery of polymorphic Alu element insertions
Source: bioRxiv or medRxiv preprint supplement (doi:10.1101/588434), 2019-03-25
Supplement: Supplementary file [file media-1.pdf]

1 Additional File 1. Supplementary Figures

2 AluMine: alignment-free method for the discovery of  
3 polymorphic Alu element insertions

4 Tarmo Puurand, Viktoria Kukuškina, Fanny-Dhelia Pajuste and Mairo Remm\*

5 *Institute of Molecular and Cell Biology, University of Tartu, Tartu, Estonia*

6

7

1. Find Alu signatures from raw reads

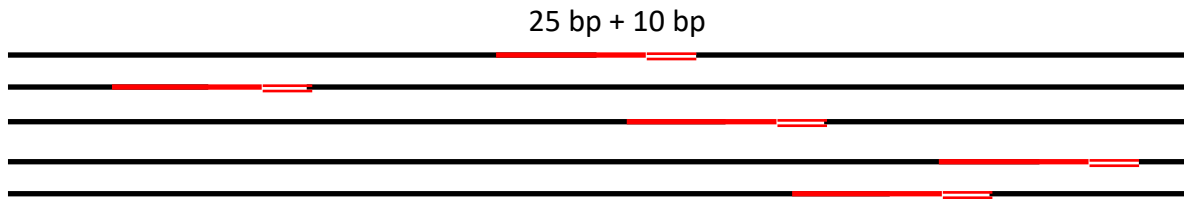

2. Localize the signature in the reference genome

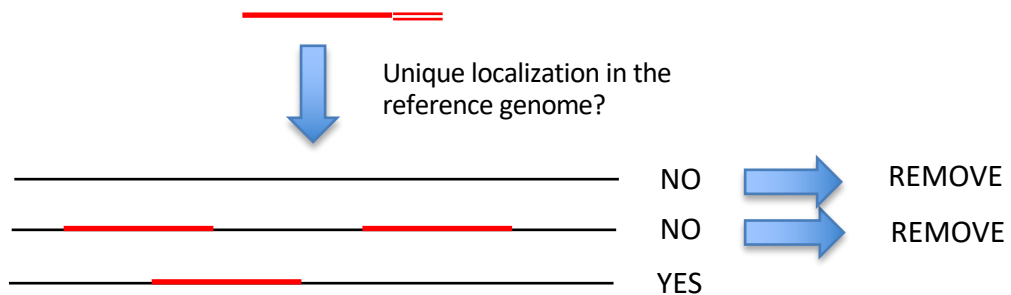

3. Test if given location in the reference has the same Alu signature

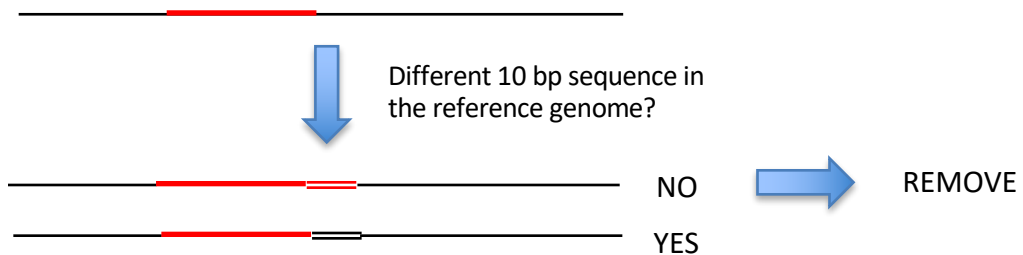

8

9 **Figure S1. Main steps of the REF- discovery pipeline.**

10

11 Step 1. Search for 10 bp Alu signature sequences in raw reads from sequenced individuals. Extract 25  
12 bp sequence from the 5'-flanking region of the signature sequence and add it to the 10 bp signature.  
13 Remove the candidate if the frequency of the resulting 35-mer in a given individual is <5 or >100.

14 Step 2. Use the 25 bp region to determine the location of the Alu element in the reference genome  
15 using gtester4. Remove the candidate if its location is not detectable in the reference genome (Alu  
16 elements from heterochromatin). Remove the candidate if the 25 bp sequence is present in multiple  
17 locations in the reference genome (Alu elements from repeated regions).

18 Step 3. Extract the 10 bp sequence from the reference genome. Compare it with the Alu signature.  
19 Remove the candidate if the reference genome already contains an Alu element in this position (fixed  
20 Alu elements).

21

22

1. Find Alu signatures from the reference genome

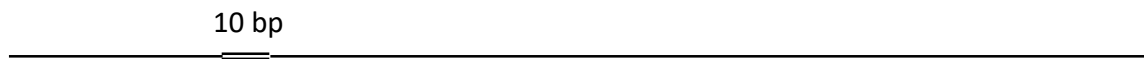

2. Check the presence of Target Site Duplication motif within 270-350 bp

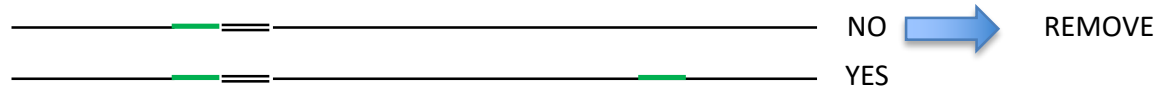

3. Similarity search

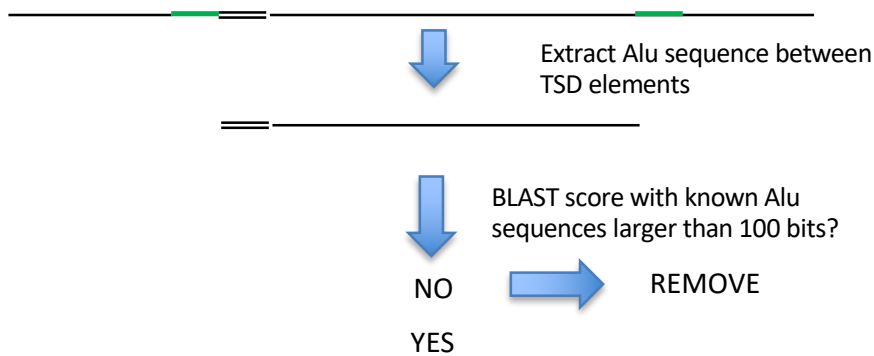

4. Test if given Alu element is absent from the chimpanzee genome

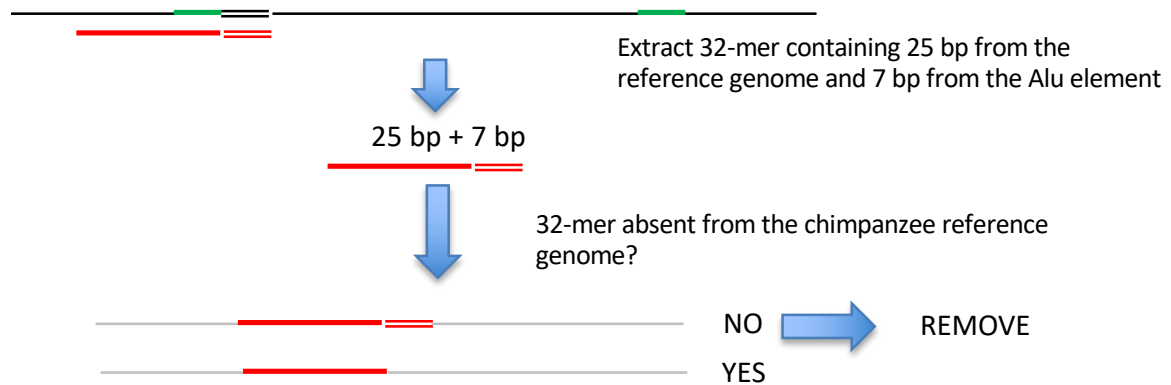

23

24 **Figure S2. Main steps of the REF+ discovery pipeline.**

25 Step 1. Find all 10 bp Alu signature sequences, allowing up to 1 mismatch with the reference  
26 genome.

27 Step 2. Identify the 5 bp target site duplication (TSD) sequence at the 5' end of the Alu signature  
28 sequence. Search for identical 5 bp TSD sequences at the 3' end of the Alu element. Remove the  
29 candidate if the 3' end TSD is not detected within 270 - 350 bp of the start of the Alu signature  
30 sequence.

31 Step 3. Test the similarity between detected Alu elements with known Alu elements.

32 Step 4. Generate REF+ *k*-mers (25 nt from the genome and 7 nt from the Alu sequence) for each  
33 candidate. Count the frequencies of these *k*-mers in the chimpanzee genome, allowing 2  
34 mismatches. Remove the candidate if the 32-mer was detected at least once in the chimpanzee  
35 genome.
